# Supplementary material for: Connexin 43 confers chemoresistance through activating PI3K
Source: PubMed Central journal article supplement (PMC8755794; doi:10.1038/s41389-022-00378-7), 2022-01-12
Supplement: 41389_2022_378_MOESM1_ESM.pdf [file 41389_2022_378_MOESM1_ESM.pdf]

**Supplemental Data-1**

**Connexin 43 confers chemoresistance through activating PI3K**

Kevin J Pridham, Farah Shah, Kasen R Hutchings, Kevin L Sheng, Sujuan Guo, Min Liu, Pratik Kanabur, Samy Lamouille, Gabrielle Lewis, Marc Morales, Jane Jourdan, Christina L Grek, Gautam G Ghatnekar, Robin Varghese, Deborah F Kelly, Robert G Gourdie, and Zhi Sheng

**Supplemental Table S1**

|                                                | <b>Reagent</b>                 | <b>Company</b>               | <b>Catalog#</b>      | <b>Reagent</b>              | <b>Company</b>               | <b>Catalog#</b>      |
|------------------------------------------------|--------------------------------|------------------------------|----------------------|-----------------------------|------------------------------|----------------------|
| <b>Chemicals/<br/>Cell Culture</b>             | GSK2636771                     | AdooQ<br>Bioscience          |                      | TGX-221                     | AdooQ<br>Bioscience          |                      |
|                                                | Temozolomide                   | AbMole<br>BioScience         |                      | Puromycin                   | Millipore-Sigma              |                      |
|                                                | $\alpha$ CT-1                  | LifeTein                     | Custom<br>synthesis  | Gap27                       | LifeTein                     | Custom<br>synthesis  |
|                                                | DMEM                           | Life<br>Technologies         |                      | EquaFETA FBS                | Atlas<br>Biologicals         |                      |
|                                                | Penicillin/<br>Streptomycin    | Gibco                        |                      | FBS                         | Peak Serum                   |                      |
|                                                | MCDB-131                       | Millipore-Sigma              |                      | B-27<br>supplement          | Life<br>Technologies         |                      |
|                                                | FGF-2                          | PeproTech                    |                      | EGF                         | PeproTech                    |                      |
|                                                | L-Glutamine                    | Gibco                        |                      | MTS cell viability<br>assay | Promega                      |                      |
|                                                | Caspase-Glo<br>3/7 assay       | Promega                      |                      | Bradford assay              | Bio-Rad<br>Laboratories      |                      |
| <b>Antibodies<br/>for western<br/>blotting</b> | Anti-phospho-<br>Cx43-S368     | Cell Signaling<br>Technology | CST-3511<br>(1:1000) | Anti-Cx43                   | Cell Signaling<br>Technology | CST-3512<br>(1:1000) |
|                                                | Anti-phospho-<br>AKT-S473      | Cell Signaling<br>Technology | CST-4051<br>(1:1000) | Anti-phospho-<br>AKT-T308   | Cell Signaling<br>Technology | CST-4056<br>(1:1000) |
|                                                | Anti-AKT                       | Cell Signaling<br>Technology | CST-4685<br>(1:1000) | Anti-phospho-<br>cRAF-S338  | Cell Signaling<br>Technology | CST-9247<br>(1:250)  |
|                                                | Anti-phospho-<br>ERK-T202/T204 | Cell Signaling<br>Technology | CST-4377<br>(1:1000) | Anti-phospho-<br>SRC-Y416   | Cell Signaling<br>Technology | CST-2101<br>(1:1000) |

|                             |                                                  |                           |                         |                                                                   |                           |                       |
|-----------------------------|--------------------------------------------------|---------------------------|-------------------------|-------------------------------------------------------------------|---------------------------|-----------------------|
|                             | Anti-p110 $\alpha$                               | Cell Signaling Technology | CST-4249<br>(1:1000)    | Anti-p110 $\beta$                                                 | Cell Signaling Technology | CST-3011<br>(1:1000)  |
|                             | Anti-p110 $\delta$                               | Cell Signaling Technology | CST-34050<br>(1:1000)   | Anti-p85                                                          | Cell Signaling Technology | CST-4292<br>(1:1000)  |
|                             | Anti- $\beta$ -actin                             | Millipore-Sigma           | MS-A3854<br>(1:5000)    | Anti-GAPDH                                                        | Santa Cruz Biotechnology  | SC-25778<br>(1:1000)  |
| <b>Immuno-precipitation</b> | Protease inhibitor                               | Millipore-Sigma           |                         | Phosphatase inhibitor                                             | Millipore-Sigma           |                       |
|                             | Anti-Cx43                                        | Millipore-Sigma           | MS-C6219<br>(1:50)      | Anti-p110 $\alpha$                                                | Cell Signaling Technology | CST-4249<br>(1:25)    |
|                             | Anti-p110 $\beta$                                | Cell Signaling Technology | CST-3011<br>(1:25)      | Anti-p110 $\delta$                                                | Cell Signaling Technology | CST-34050<br>(1:25)   |
|                             | Rabbit IgG                                       | Santa Cruz Biotechnology  | SC-2027<br>(1:400)      | Protein G Dynabeads                                               | Thermo-Fisher Scientific  |                       |
| <b>shRNAs /plasmids</b>     | Cx43 shRNA                                       | Millipore-Sigma           | TRCN<br>0000059773      | PIK3CA shRNA                                                      | Thermo-Fisher Scientific  | RHS4844-<br>101656239 |
|                             | PIK3CB shRNA                                     | Thermo-Fisher Scientific  | RHS4884-<br>10165656350 | PIK3D shRNA                                                       | Thermo-Fisher Scientific  | RHS4884-<br>101655755 |
|                             | pBABE-puro                                       | Addgene                   | 1764                    | pBABE-PIK3CA-E545K                                                | Addgene                   | 12525                 |
|                             | pCMV5-ERK2-Q103A                                 | Addgene                   | 40816                   | pBABE-SRC-Y527F                                                   | Addgene                   | 13660                 |
| <b>Animal experiments</b>   | Matrigel Matrix                                  | Corning                   |                         | Scid/beige mice                                                   | Taconic Biosciences       |                       |
| <b>Kits</b>                 | Kinase-Glo <sup>®</sup> Luminescent Kinase Assay | Progema                   |                         | Amplex <sup>™</sup> Red Glutamic Acid/Glutamate Oxidase Assay Kit | Thermo-Fisher Scientific  |                       |

**Supplemental Table S2**

| <b>Gene symbol</b> | <b>Gene full name</b>          | <b>Alias</b>  | <b>Abbreviations</b> |
|--------------------|--------------------------------|---------------|----------------------|
| <b>GJA1</b>        | Gap junction protein alpha 1   | Connexin 43   | <b>Cx43</b>          |
| <b>GJA3</b>        | Gap junction protein alpha 3   | Connexin 46   | <b>Cx46</b>          |
| <b>GJA4</b>        | Gap junction protein alpha 4   | Connexin 37   | <b>Cx37</b>          |
| <b>GJA5</b>        | Gap junction protein alpha 5   | Connexin 40   | <b>Cx40</b>          |
| <b>GJA8</b>        | Gap junction protein alpha 8   | Connexin 50   | <b>Cx50</b>          |
| <b>GJA9</b>        | Gap junction protein alpha 9   | Connexin 58   | <b>Cx58</b>          |
| <b>GJA10</b>       | Gap junction protein alpha 10  | Connexin 62   | <b>Cx62</b>          |
| <b>GJB1</b>        | Gap junction protein beta 1    | Connexin 32   | <b>Cx32</b>          |
| <b>GJB2</b>        | Gap junction protein beta 2    | Connexin 26   | <b>Cx26</b>          |
| <b>GJB3</b>        | Gap junction protein beta 3    | Connexin 31   | <b>Cx31</b>          |
| <b>GJB4</b>        | Gap junction protein beta 4    | Connexin 30.3 | <b>Cx30.3</b>        |
| <b>GJB5</b>        | Gap junction protein beta 5    | Connexin 31.1 | <b>Cx31.1</b>        |
| <b>GJB6</b>        | Gap junction protein beta 6    | Connexin 30   | <b>Cx30</b>          |
| <b>GJB7</b>        | Gap junction protein beta 7    | Connexin 25   | <b>Cx25</b>          |
| <b>GJC1</b>        | Gap junction protein gamma 1   | Connexin 45   | <b>Cx45</b>          |
| <b>GJC2</b>        | Gap junction protein gamma 2   | Connexin 47   | <b>Cx47</b>          |
| <b>GJC3</b>        | Gap junction protein gamma 3   | Connexin 30.2 | <b>Cx30.2</b>        |
| <b>GJD2</b>        | Gap junction protein delta 2   | Connexin 36   | <b>Cx36</b>          |
| <b>GJD3</b>        | Gap junction protein delta 3   | Connexin 31.9 | <b>Cx31.9</b>        |
| <b>GJD4</b>        | Gap junction protein delta 4   | Connexin 40.1 | <b>Cx40.1</b>        |
| <b>GJE1</b>        | Gap junction protein epsilon 1 | Connexin 23   | <b>Cx23</b>          |

**Supplemental Table S2. Nomenclature of connexins.** Information regarding gene symbols and aliases was retrieved from GeneCards (<https://www.genecards.org>).

**Supplemental Table S3**

| <b>Cell lines</b> | <b>Cx43</b> | <b>pAKT-S473</b> | <b>p110<math>\beta</math></b> | <b>MGMT</b> | <b>TMZ IC50 (<math>\mu</math>M)</b> |
|-------------------|-------------|------------------|-------------------------------|-------------|-------------------------------------|
| SF295             | 1.4         | 2.0              | 0.5                           | No          | 500                                 |
| U87MG             | 3.2         | 2.2              | 0.7                           | No          | 1000                                |
| A172              | 0.5         | 0.1              | 0.4                           | No          | 30                                  |
| LN229             | 0.5         | 0.0              | 0.2                           | No          | 20                                  |
| SF268             | 0.7         | 0.1              | 0.3                           | No          | 20                                  |
| SNB75             | 0.9         | 0.2              | 0.2                           | No          | 293                                 |

**Supplemental Table S3. Levels of Cx43, pAKT-S473, p110 $\beta$ , MGMT and TMZ IC50.** Data were retrieved from our previous publications (21, 27).

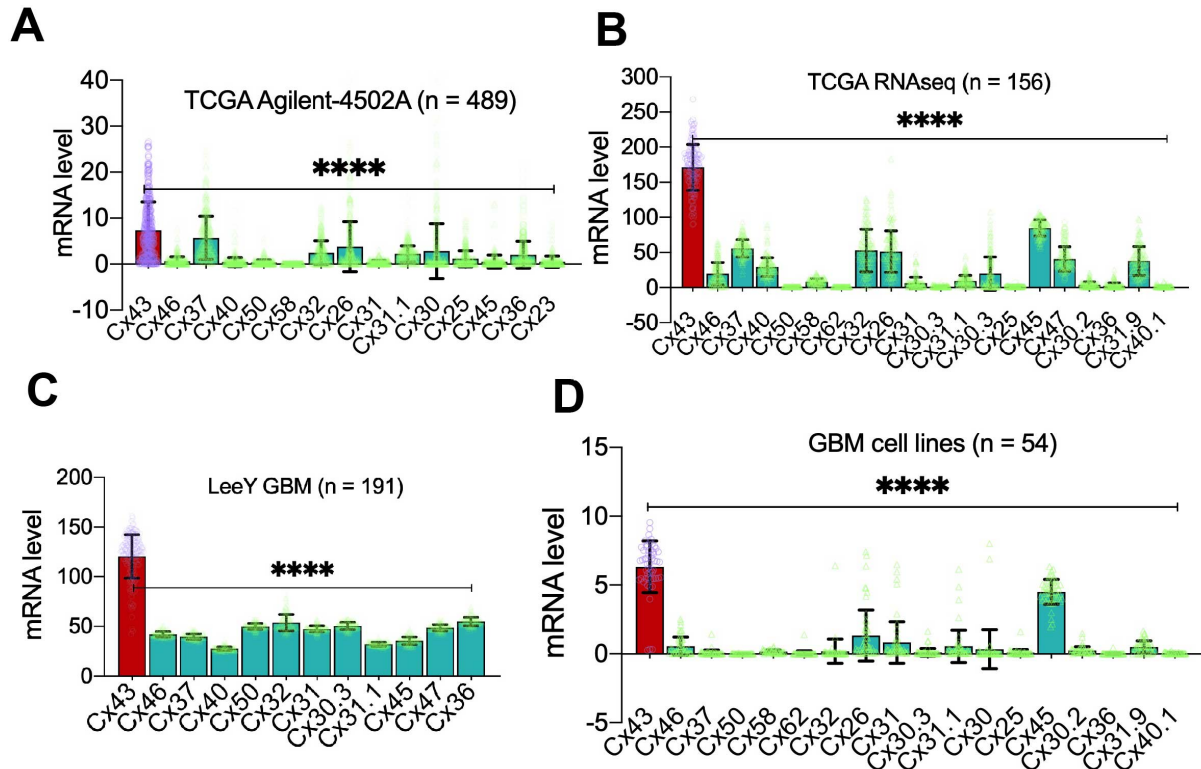

**Supplemental Fig. S1. mRNA levels of connexins in GBM.** Gene expression data were retrieved from cBioPortal, GlioVis, or DepMap. Shown are mRNA levels of connexins in the TCGA Agilent-4502A microarray (**A**), the TCGA RNAseq (**B**), the LeeY GBM dataset (**C**), and DepMap GBM cell lines (**D**). Case numbers (n) are also shown. Error bars represent standard deviations. Cx43 is highlighted in red and other connexins are in green. Individual data points are also shown (purple for Cx43 and yellow for other connexins). *P* values were obtained using One-Way ANOVA with Dunnett test for correction of multiple comparisons. \*\*\*\*. *P* < 0.0001. All analyses were performed and results were plotted using Prism 9.

Supplemental Fig. S2

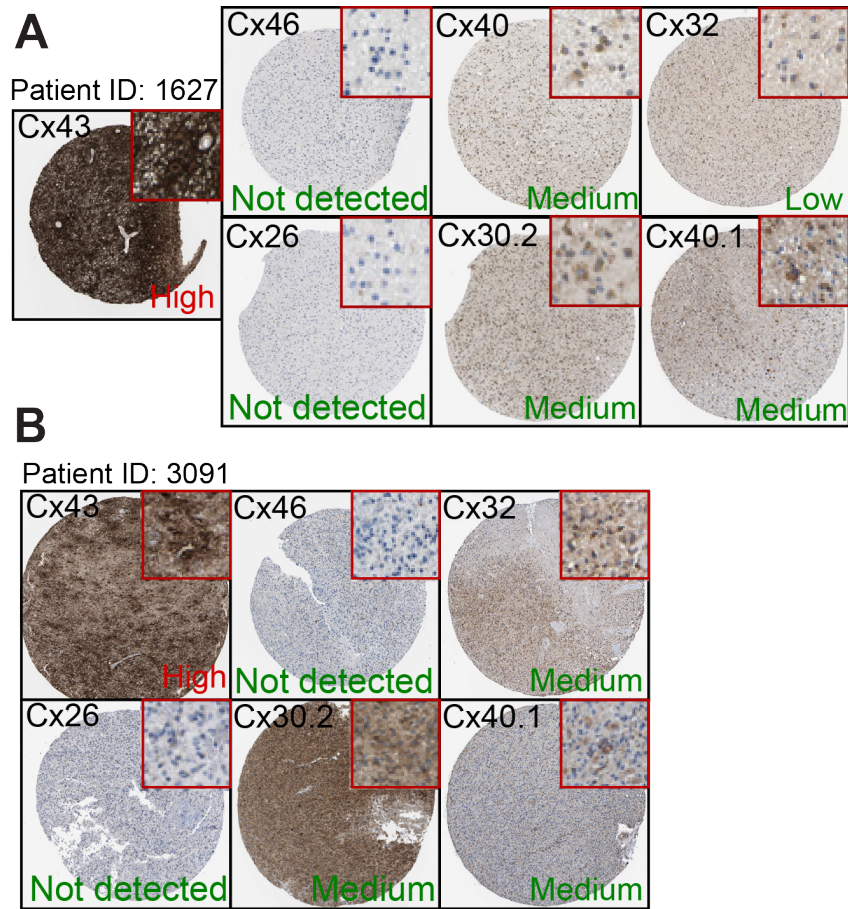

**Supplemental Fig. S2. Levels of connexins in high-grade glioma.** Immunohistochemical staining images of high-grade glioma were retrieved the Human Protein Atlas. Images of two patient specimens are shown in **A** and **B**, respectively. Inset figures depict details of immunostaining. Levels of staining are highlighted in red (Cx43) or in green (other connexins).

Supplemental Fig. S3

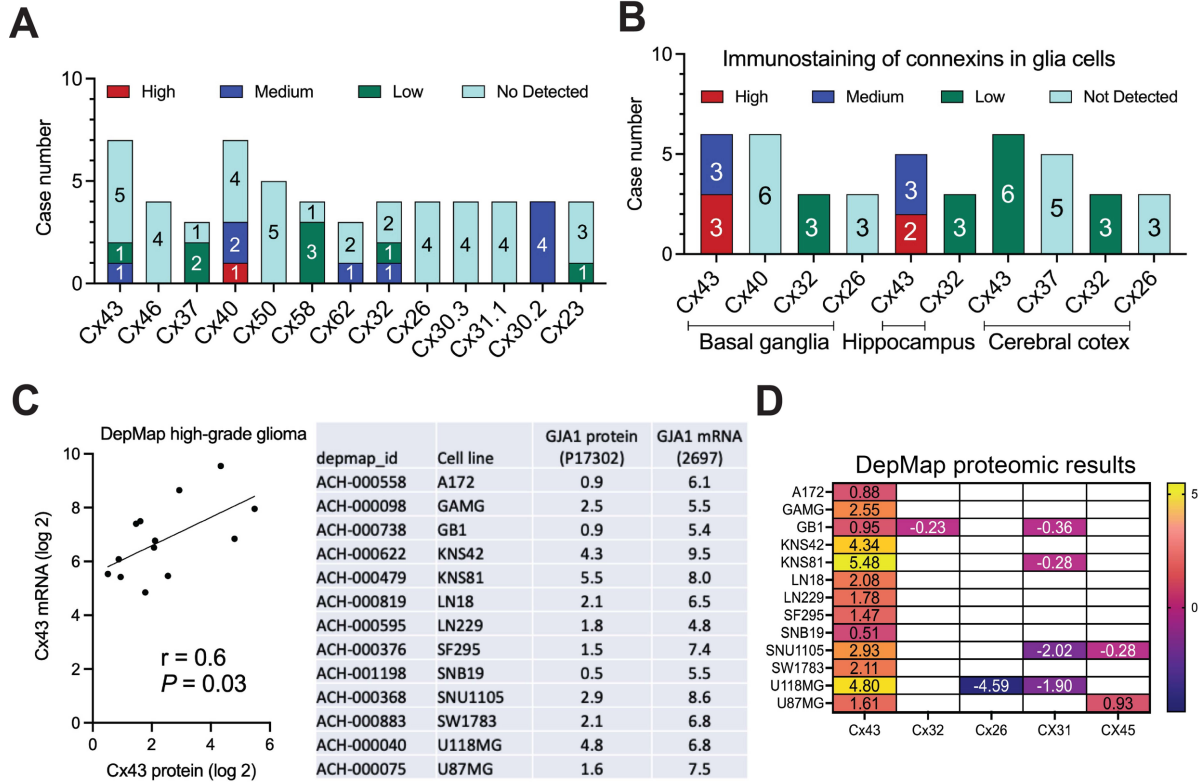

**Supplemental Fig. S3. Expression of connexins in normal and malignant brain cells and tissues.** (A) Levels of connexins in low-grade glioma. Case numbers with different immunostaining intensities are shown. Data were retrieved from The Human Protein Atlas. (B) Immunostaining results of connexin proteins in glia cells in basal ganglia, hippocampus, and cerebral cortex. (C) Correlation of levels between Cx43 mRNA and protein in high-grade glioma cell lines. Proteomic and transcriptomic results in the same cell lines (GBM and astrocytoma) were plotted and Pearson correlation coefficient  $r$  was determined using Prism software. Data were retrieved from DepMap. (D) DepMap proteomic results of connexin proteins in high-grade glioma cell lines. All analyses were performed and results were plotted using Prism 9.

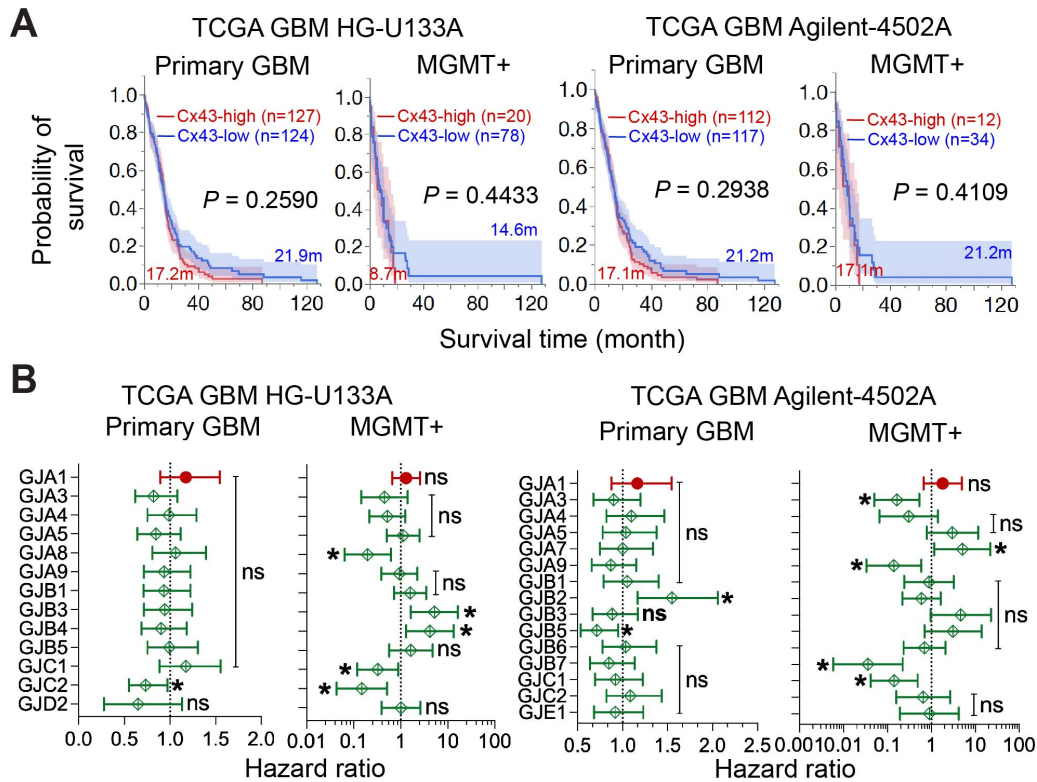

**Supplemental Fig. S4. Kaplan-Meier analysis and Cox univariate analysis in the primary or MGMT+ TCGA datasets.** Data were retrieved from cBioportal. Patients were divided into Cx43-high (red, top 25 percentile) and Cx43-low (blue, bottom 25 or 75 percentile) based upon Cx43 mRNA levels in primary GBM (Primary GBM) or MGMT-expressing primary GBM (MGMT+). Kaplan-Meier analysis (A) and Cox univariate analysis (B) were performed using JMP Pro and results were plotted using either JMP Pro or Prism 9. Case number (n), average survival time in months (m), 95% CI (shadow), long-rank P values, and hazard ratios are shown. \*: P < 0.05. ns: not significant.



## Supplemental Figure S5

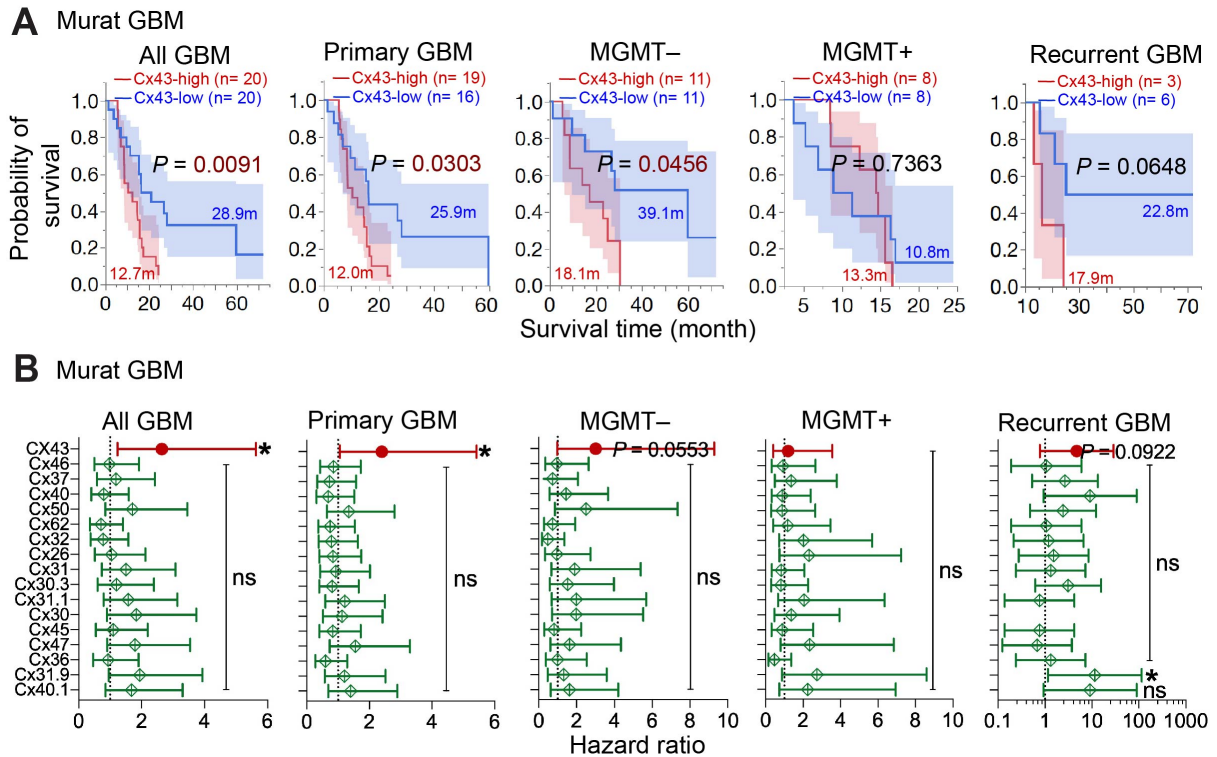

**Supplemental Fig. S5. Kaplan-Meier analysis and Cox univariate analysis in the Murat GBM dataset.** Data were retrieved from Gliovis. Patients were divided into Cx43-high (red, top 25 percentile) and Cx43-low (blue, bottom 25 or 75 percentile) based upon Cx43 mRNA levels in all GBM (All GBM), primary GBM (Primary GBM), MGMT-deficient primary GBM (MGMT-), MGMT-expressing (MGMT+), or recurrent GBM (Recurrent GBM). Kaplan-Meier analysis (**A**) and Cox univariate analysis (**B**) were performed using JMP Pro and results were plotted using JMP Pro or Prism 9. Case number (n), average survival time in months (m), 95% CI (shadow), long-rank  $P$  values, and hazard ratios are shown. \*:  $P < 0.05$ . ns: not significant.

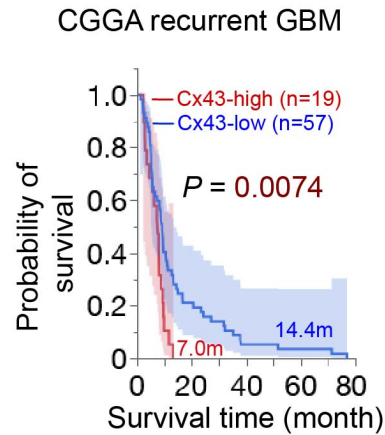

**Supplemental Fig. S6. Kaplan-Meier analysis of CGGA recurrent GBMs.** Data regarding 76 recurrent GBM were retrieved from the CGGA data portal. Patients were divided into Cx43-high (top 25 percentile) or Cx43-low (bottom 75 percentile) based on Cx43 mRNA levels in 76 recurrent GBMs. Kaplan-Meier survival analyses were performed using JMP Pro. Case number (n), average survival time in months (m), and long-rank  $P$  values are shown.

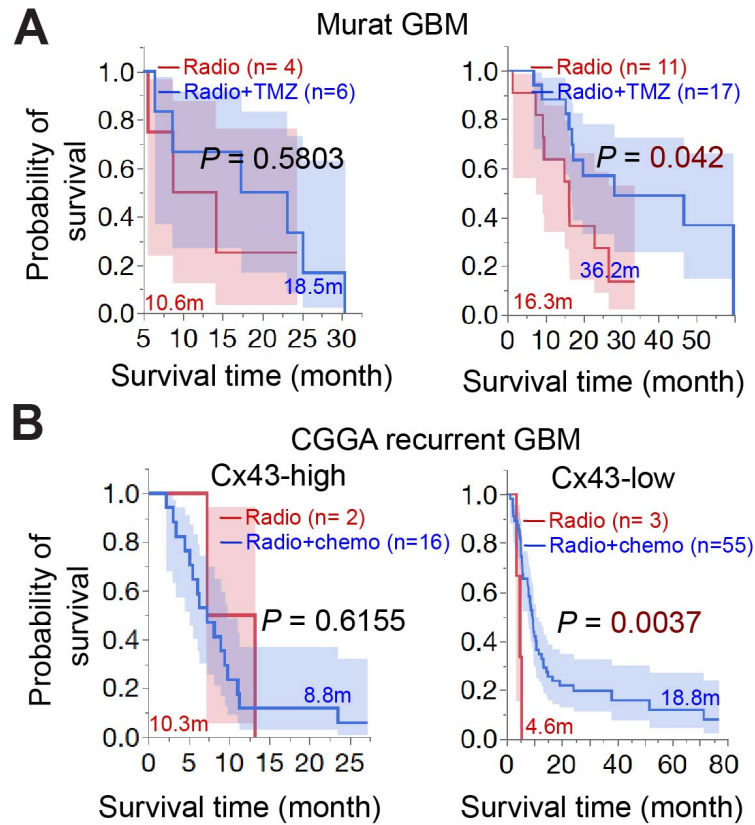

**Supplemental Fig. S7. Kaplan-Meier analysis in Murat GBMs and CGGA recurrent GBMs.** (A) Kaplan Meier analysis in Murat GBM. MGMT- GBMs were divided into Cx43-high (top 25 percentile) or Cx43-low group (bottom 75 percentile). Patients treated with radiation alone (Radio; red) were compared to patients treated with both radiation and TMZ (Radio+TMZ; blue). (B) Kaplan Meier analysis in CGGA recurrent GBM. Data regarding 76 recurrent GBM were retrieved from the CGGA data portal. Patients were divided into Cx43-high (top 25 percentile) or Cx43-low (bottom 75 percentile) based on Cx43 mRNA levels in 76 recurrent GBMs. Cx43-high (top 25 percentile) or Cx43-low (bottom 75 percentile) patients were divided into Radio (red, treated with radiation only) or Radio+chemo (blue, treated with radiation and chemotherapy) based on Cx43 mRNA levels in recurrent GBMs. Kaplan-Meier survival analyses were performed using JMP Pro. Case number (n), average survival time in months (m), and long-rank  $P$  values are shown.

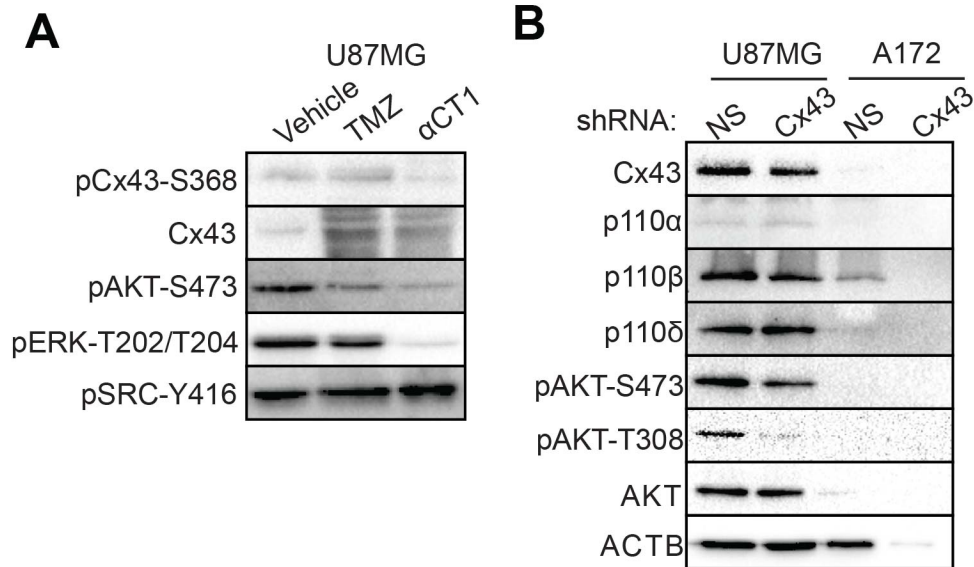

**Supplemental Fig. S8. Repeats of  $\alpha$ CT1/TMZ treatment and Cx43 knockdown.** (A) Signaling pathways affected by  $\alpha$ CT1. Cx43-high U87MG cells were treated with 100  $\mu$ M  $\alpha$ CT1 or 50  $\mu$ M TMZ for 4 days. (B) PI3K signaling upon depletion of Cx43. U87MG and A172 cells were transiently transfected with viruses containing an NS shRNA or a Cx43 shRNA for 3 days. Signaling molecules were analyzed using immunoblotting.

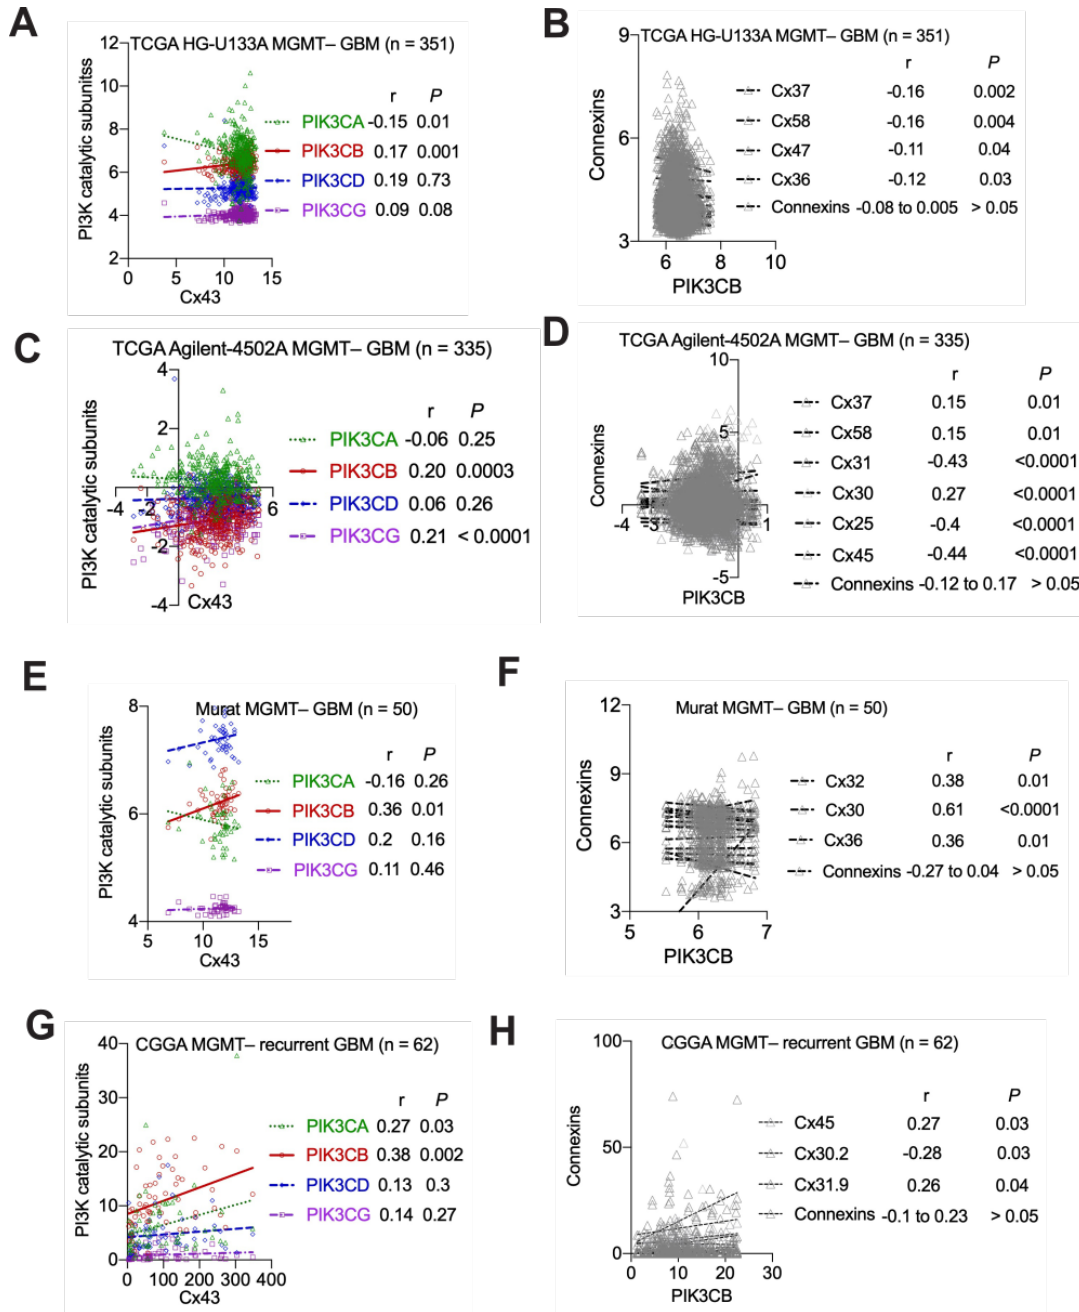

**Supplemental Fig. S9. Correlation between connexins and PI3K catalytic subunits.** Pearson correlation coefficient assay was performed in different gene expression datasets using Prism 9. mRNA levels of Cx43 were compared to mRNA levels of PI3K catalytic subunits (**A**, **C**, **E**, and **G**) in four different datasets as indicated. mRNA levels of PIK3CB were compared to those of connexin mRNAs (**B**, **D**, **F**, and **H**). The coefficient *r* and corresponding *P* values are shown.

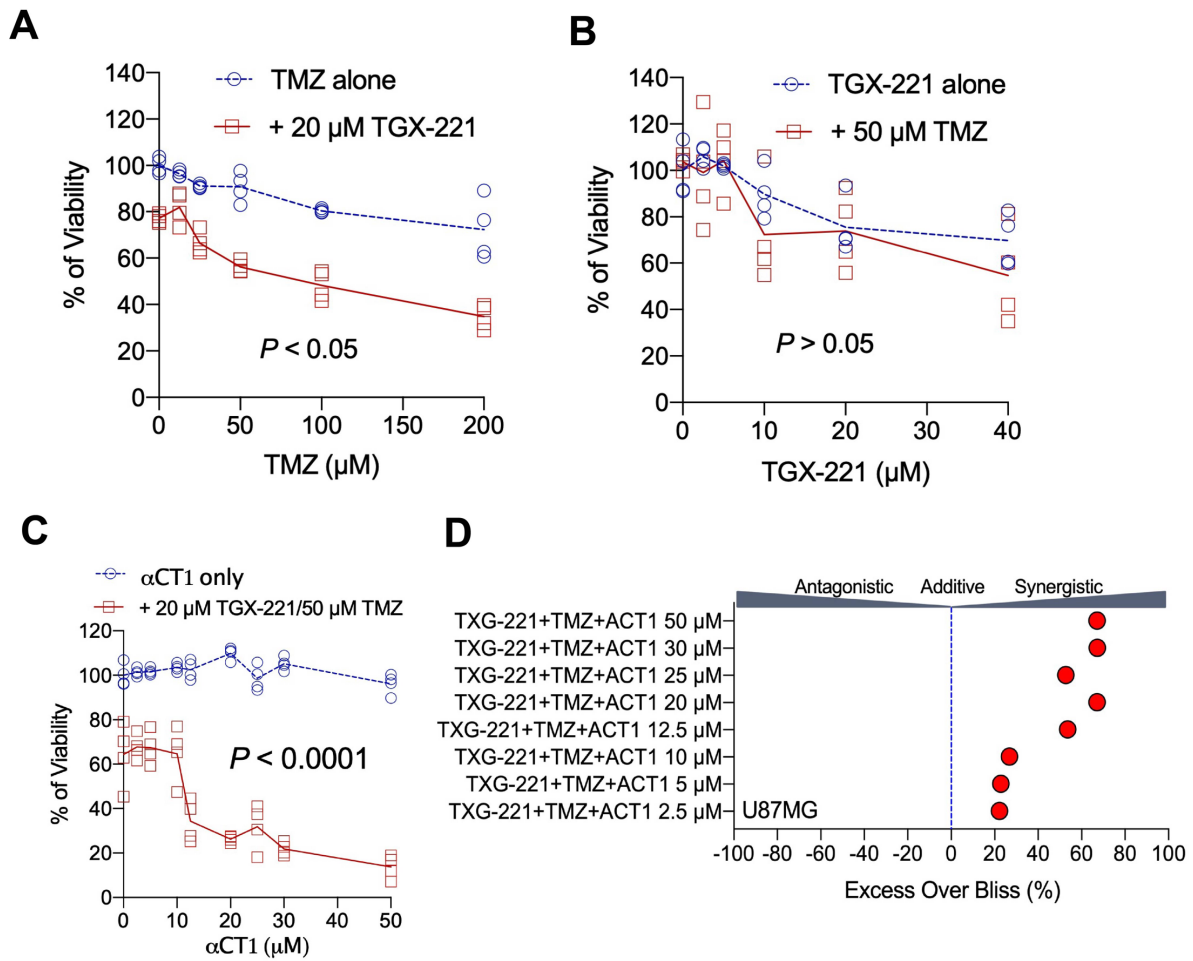

**Supplemental Fig. S10. Optimization of  $\alpha$ CT1, TGX-221 and TMZ in U87MG cells.** (A) Combination of 20  $\mu$ M TGX-221 and TMZ at various concentrations. U87MG cells were treated with drug combinations as indicated for 6 days. Cell viability was determined using the MTS viability assay. The vehicle DMSO was the control and set as 100%. Treated cells were normalized to DMSO-treated cells. (B) Combination of 50  $\mu$ M TMZ and TGX-221 at various concentrations. (C) Combination of 20  $\mu$ M TGX-221/50  $\mu$ M TMZ and  $\alpha$ CT1 at different concentrations. (D) Scores of Excess Over Bliss in C calculated using the Bliss Independence model. One-way ANOVA and student *t* test were used to determine statistical significance. Drug combinations with strong synergistic effect were marked in red.

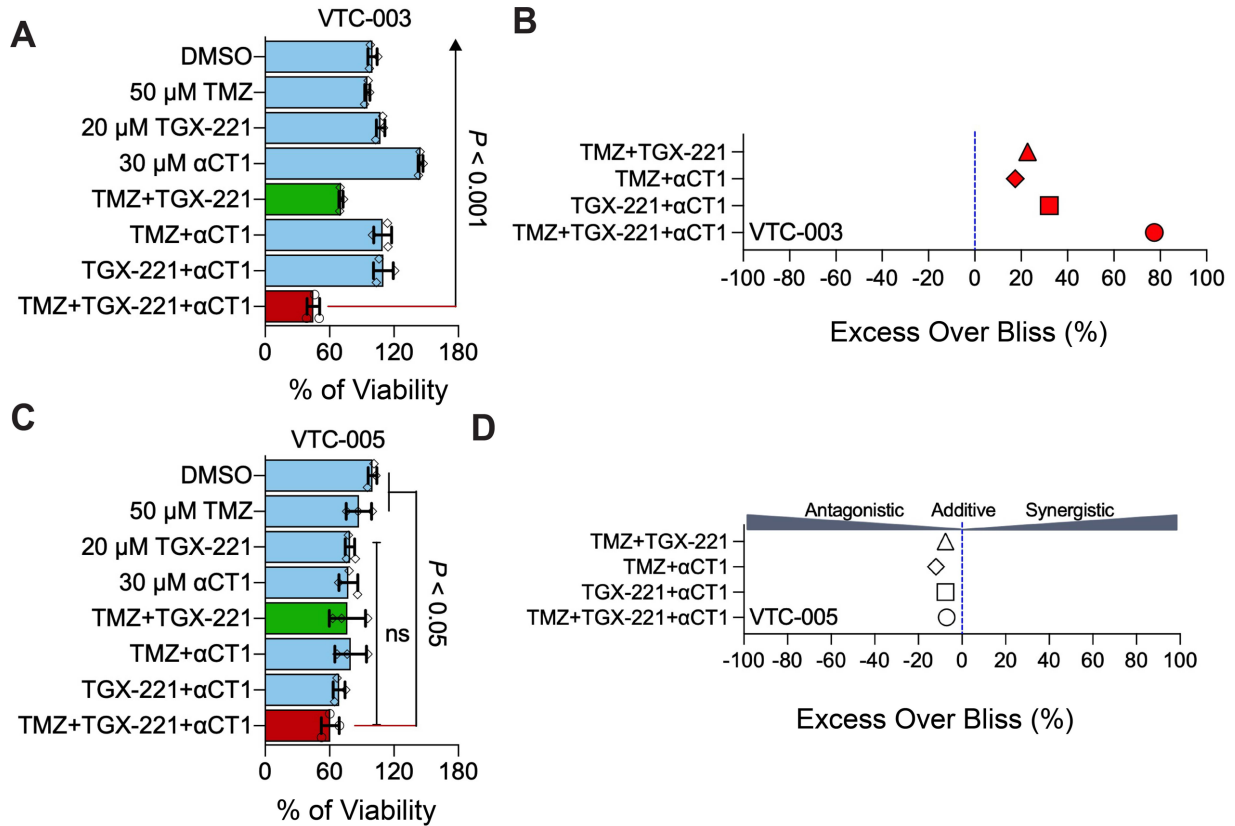

**Supplemental Fig. S11. The  $\alpha$ CT1/TGX combo in VTC-003 and VTC-005.** (A) Viability of VTC-003 cells treated with different drug combinations for 6 days. Cell viability was determined using the MTS viability assay. (B) Scores of Excess Over Bliss of VTC-003 calculated using the Bliss Independence model. (C) Viability of VTC-005 cells treated with different drug combinations. (D) Scores of Excess Over Bliss of VTC-005 cells calculated using the Bliss Independence model. One-way ANOVA or student *t* test were used to determine statistical significance. Drug combinations with strong synergistic effect were marked in red.

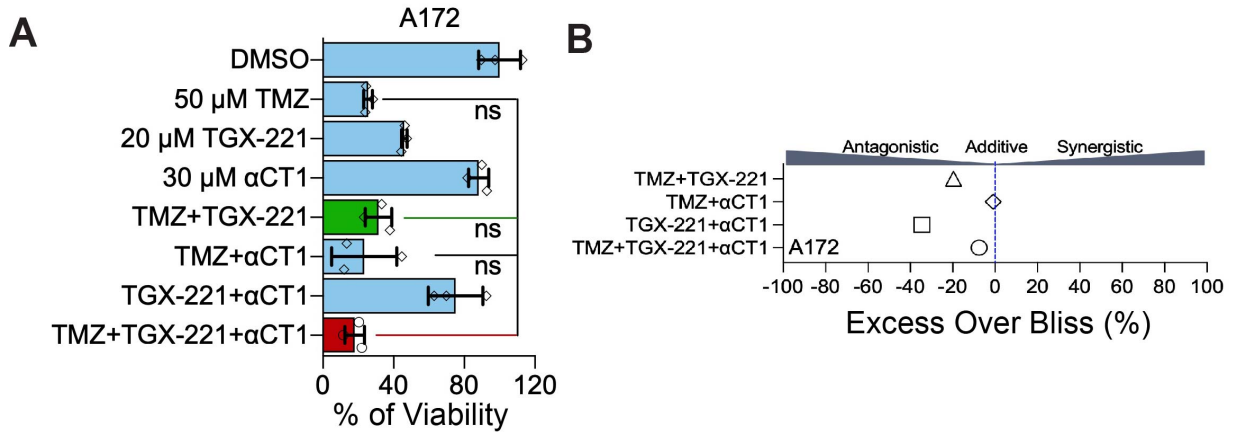

**Supplemental Fig. S12. The  $\alpha$ CT1/TGX combo in A172.** (A) Viability of A172 cells treated with different drug combinations for 6 days. Cell viability was determined using the MTS viability assay. (B) Scores of Excess Over Bliss calculated using the Bliss Independence model. One-way ANOVA or student *t* test were used to determine statistical significance.



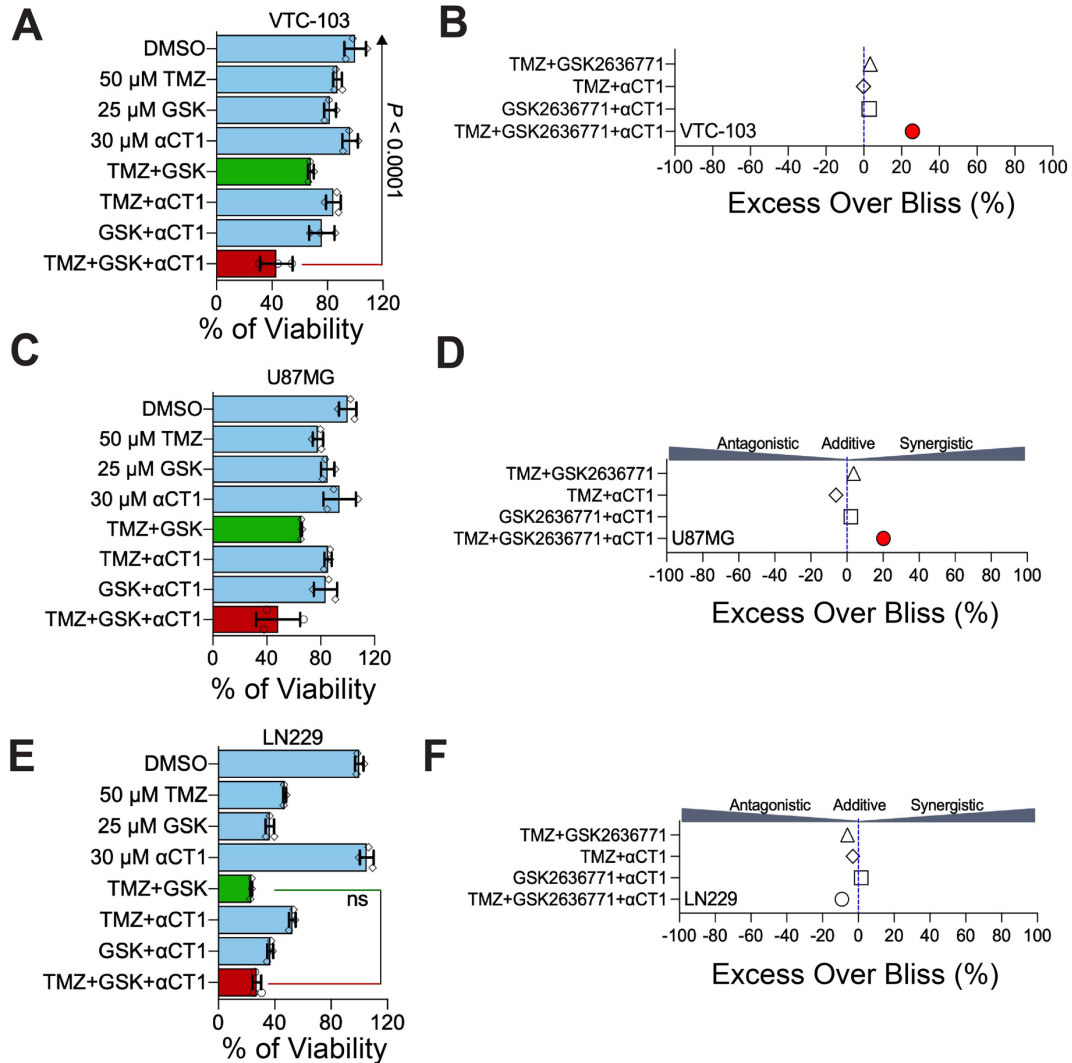

**Supplemental Fig. S13. A combination of  $\alpha$ CT1 and GSK2636771 overcomes TMZ resistance.** The effect of the  $\alpha$ CT1/GSK/TMZ combo in VTC-103 (**A**), U87MG (**C**), and LN229 (**E**) cells. Cells were treated with 50  $\mu$ M TMZ, 25  $\mu$ M GSK2636771, and/or 30  $\mu$ M  $\alpha$ CT1 including single agents, double combinations and the  $\alpha$ CT1/GSK/TMZ combo. Excess Over Bliss scores of drug combinations in VTC-103 (**B**), U87MG (**D**), and LN229 (**F**) cells were calculated using the Bliss Independence mode. One-way ANOVA with Dunnett test for correction of multiple comparisons or Student's *t* test was used to determine statistical significance. ns: not significant. Drug combinations with strong synergistic effect were marked in red.

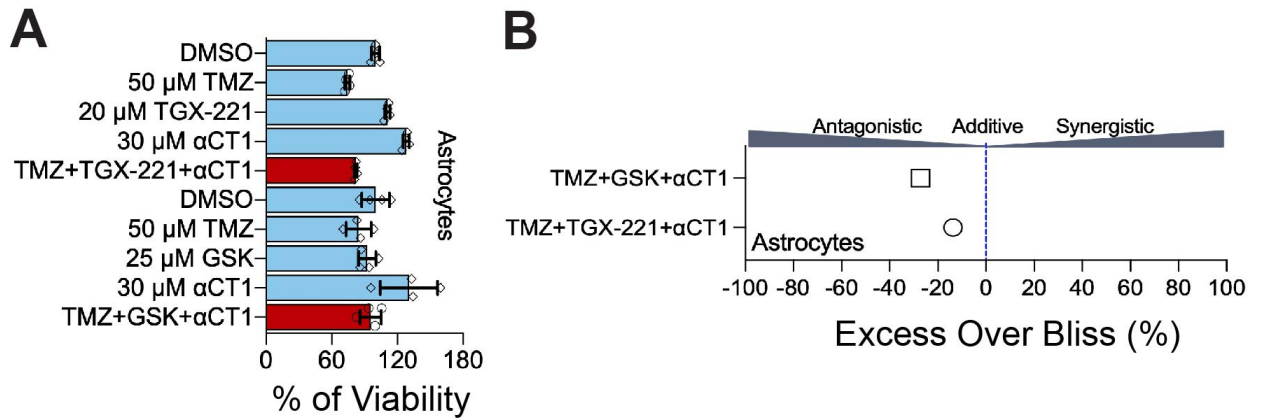

**Supplemental Fig. S14. A combination of  $\alpha$ CT1 and TGX-221 or GSK2636771 in astrocytes.** (A) The effect of the  $\alpha$ CT1/GSK/TMZ or  $\alpha$ CT1/TGX-221/TMZ combo in astrocytes. Cells were treated with 50  $\mu$ M TMZ, 30  $\mu$ M  $\alpha$ CT1, and/or 25  $\mu$ M GSK2636771 or 20  $\mu$ M TGX-221. (B) Excess Over Bliss scores of drug combinations in astrocytes cells were calculated using the Bliss Independence mode.
