# Supplementary material for: Connexin 43 confers chemoresistance through activating PI3K
Source: PubMed Central journal article supplement (PMC8755794; doi:10.1038/s41389-022-00378-7), 2022-01-12

**Connexin 43 confers chemoresistance through activating PI3K**

Kevin J Pridham, Farah Shah, Kasen R Hutchings, Kevin L Sheng, Sujuan Guo, Min Liu, Pratik Kanabur, Samy Lamouille, Gabrielle Lewis, Marc Morales, Jane Jourdan, Christina L Grek, Gautam G Ghatnekar, Robin Varghese, Deborah F Kelly, Robert G Gourdie, and Zhi Sheng

**Whole images of immunoblots**

Figure 3 full images of immunoblots

Figure 3A/U87MG

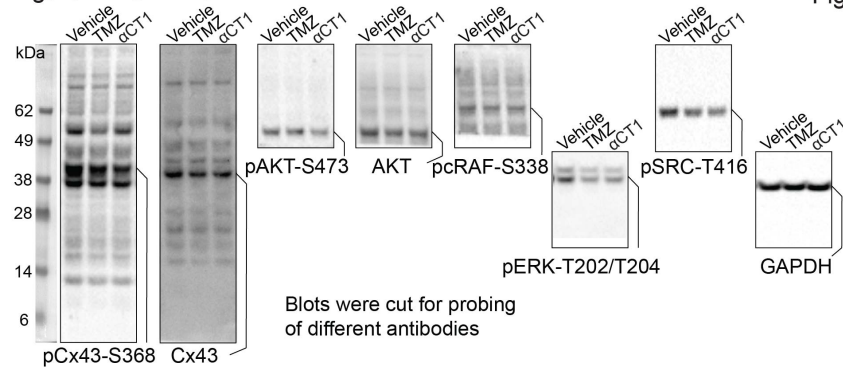

Figure 3G

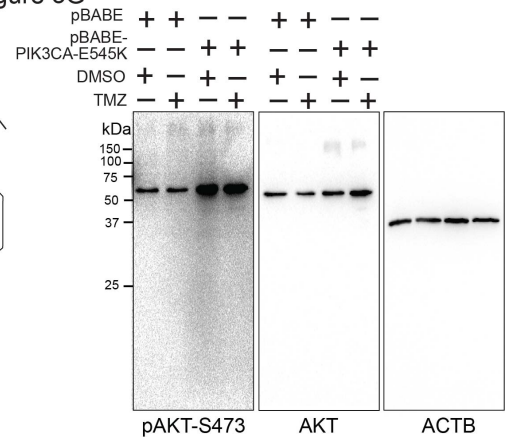

Figure 3B

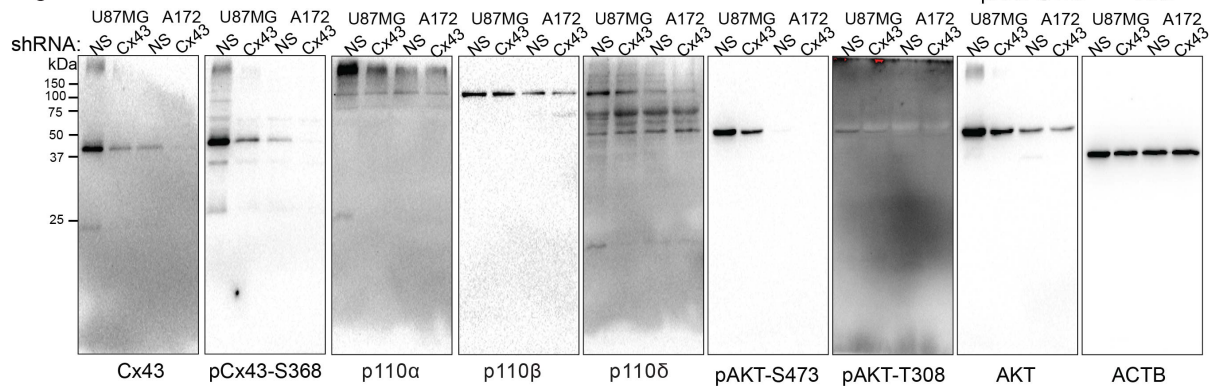

Figure 3C

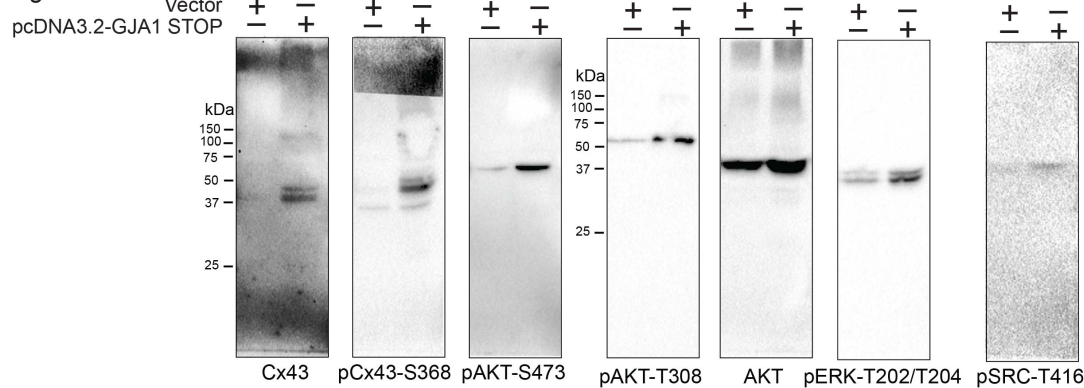



Figure 4 full images of immunoblots  
Figure 4A/U87MG

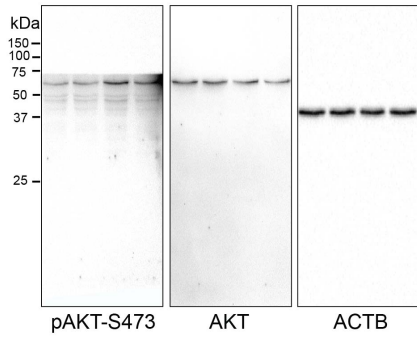

Figure 4L

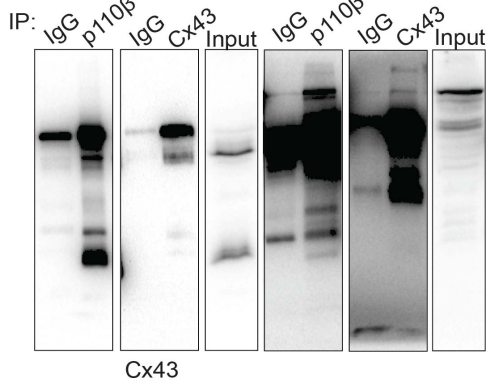

Figure 4M

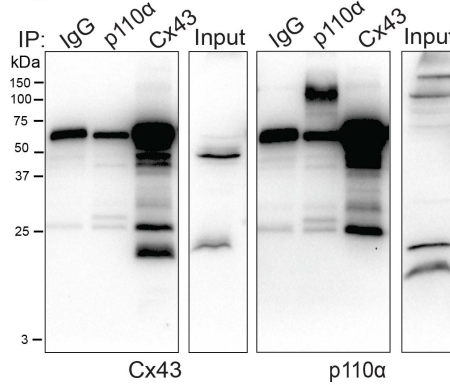

Figure 4N

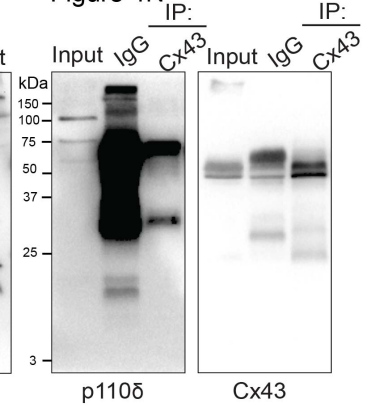

Figure 4O

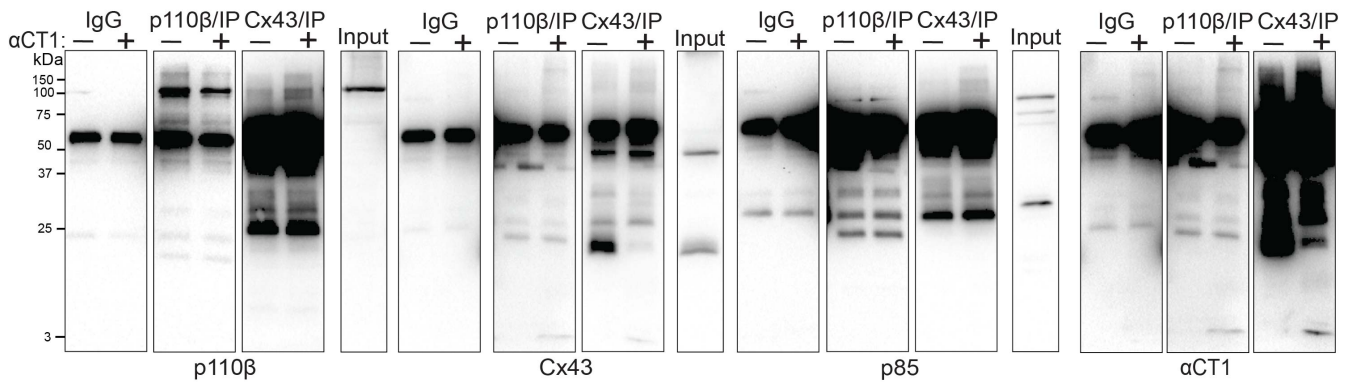

Supplement: 41389_2022_378_MOESM2_ESM.pdf [file 41389_2022_378_MOESM2_ESM.pdf]
